# Supplementary material
Source: PubMed Central journal article supplement (PMC4251908)
Supplement: qai-67-s179-s001.pdf [file qai-67-s179-s001.pdf]

**Supplementary Data - Table S1: Unadjusted odds of probable depression**

| <b>Variable</b>                             | <b>Unadjusted odds ratio<br/>(95% CI)</b> |
|---------------------------------------------|-------------------------------------------|
| Pregnancy Status                            |                                           |
| Pregnant vs Non-pregnant                    | 1.12 (0.76 – 1.65)                        |
| Postpartum vs. Non-pregnant                 | 1.34 (0.89 – 2.01)                        |
| Viral Suppression: Yes vs. No               | 0.23 (0.18 – 0.29)                        |
| Time on ART                                 |                                           |
| 6-24 months vs. 0-6 months                  | 0.29 (0.23 – 0.36)                        |
| 24 or more months vs. 0-6 months            | 0.12 (0.09 – 0.15)                        |
| MOS Physical Health Summary score           |                                           |
| 0-60 vs. more than 60                       | 4.24 (3.41 – 5.25)                        |
| Marital status                              |                                           |
| Never married vs. Married                   | 0.68 (0.39 – 1.18)                        |
| Divorce vs. Married                         | 1.09 (0.77 -1.55)                         |
| Widowed vs. Married                         | 1.28 (0.89 – 1.86)                        |
| Age (per year)                              | 0.98 (0.96 -0.997)                        |
| Education                                   |                                           |
| No schooling vs. Some Secondary or more     | 1.00 (0.64 – 1.57)                        |
| Some Primary vs. Some Secondary or more     | 1.23 (0.85 – 1.83)                        |
| Complete Primary vs. Some Secondary or more | 0.75 (0.47 – 1.20)                        |
| Assets                                      |                                           |
| Middle (40-80%) vs. Rich (top 20%)          | 1.30 (0.87 – 1.94)                        |
| Poor (bottom 40%) vs. Rich (top 20%)        | 1.38 (0.92 – 2.08)                        |
| Livebirths                                  |                                           |
| 0 vs 2 or more                              | 10.0 (4.84 – 20.74)                       |
| 1 vs 2 or more                              | 1.26 (0.92 – 1.71)                        |
| Death in household in past 12 months        |                                           |
| No vs. Yes                                  | 0.70 (0.50 – 0.97)                        |
